# Supplementary material for: Calving Front Machine (CALFIN): Glacial Termini Dataset and Automated Deep Learning Extraction Method for Greenland, 1972–2019
Source: Copernicus journal article supplement (doi:10.5194/tc-2020-231), 2020-10-14
Supplement: Supplementary file [file tc-2020-231-AC2-supplement.pdf]

## Anonymous Referee #2

### General Comments:

General Comment Cheng et al. present an automated method for delineating glacier calving fronts – named Calving Front Machine (CALFIN) - based on a deep learning approach, accompanied by a new dataset of Greenland glacier termini. The principal input data are Landsat optical images acquired since 1972. The methodology builds on previous work by Mohajerani et al., Zhang et al., and Baumhoer et al. and uses computing systems, named neural networks, that learn patterns in training data, in order to identify similar patterns (such as glacier termini) in new data. The authors detail the various steps of the processing chain and produce a set of shapefiles, which are evaluated and intercompared with both internal and external (manually) retrieved calving front datasets using different quality metrics. The main outcome is an extensive dataset covering 66 outlet glaciers around Greenland with in total 22,679 individual calving fronts encompassing the period 1972-2019. The method and new data set reportedly exceeds the accuracy of previous work and approaches human levels of accuracy in delineating glacier termini, the key takeaway being the maturation of neural networks for automated calving front detection.

Automated calving front extraction is a long sought after goal, that recently gained new attention thanks to advances in modern computing technology and increasing availability of satellite EO data. The use of deep learning/neural networks – the subject of this paper - to achieve this is very promising indeed. This paper by Cheng et al. is a welcome addition to existing literature on this topic as is the associated dataset for the community, expanding on previous efforts. In particular, the extension to the early days of Landsat acquisitions, enabling the retrieval of a dense Greenland dataset covering nearly 50 years, is of great relevance for exploring factors that are controlling the varying response to climate change for the outlet glaciers in this region and for quantifying their contribution to future sea level rise.

That said, I do think there is some room for improvement of the manuscript, both in terms of presentation as well as substance. What is missing is a clear description of the objectives in the introduction, based on a literature review on the current standing, issues and knowledge gaps in calving front extraction based on machine learning. This gives the reader, not so familiar with the topic, as well as the presented methodological decisions and improvements a better context.

We thank the reviewer for their time, comments, and suggestions, which have been integrated into the manuscript. A clear description of the objective has been added to the introduction and abstract. This is based on issues and knowledge gaps covered in the added literature review, which repurposes existing sections to provide better methodological context. Additional references have been added throughout the introduction, and a new paragraph has been integrated as follows: “Existing work by Mohajerani et al. (2019) pioneers the usage of these techniques by applying the Ronneberger et al. (2015) UNet deep neural network towards Jakobshavn, Helheim, Sverdrup, and Kangerlussuaq. It achieves a mean distance error of 96.3 m, but is restricted by the preprocessing requirement of aligning the flow direction to be vertical, and inability to handle branching/non-linear calving fronts. Zhang et al. (2019) evaluates

a modified UNet applied to TerraSAR-X data over Jakobshavn, and achieves a mean distance error of 104 m, but is limited in scope. Baumhoer et al. (2019) expands the application of the UNet to Sentinel 1 imagery of Antarctica, extracting full coastline delineations and achieving a mean distance error of 108 m. Ultimately, these case studies provide the groundwork for the automatic, accurate, large scale, longtime-series, high temporal resolution, and potentially multi-sensor extraction of glacial terminus positions.”

Another weak point is that the ‘data analysis’ does not go any further than a figure showing a rather simple comparison with existing data sets along a flowline of one single glacier. Even though this is clearly written as a methodology paper this is a missed opportunity to showcase a nice data product in my opinion. Perhaps something can be said about general trends in advance/retreat in different regions. Also, I think some sections and descriptions are too brief and need further expansion. Further comments and suggestions for improvement are provided below:

Several sections have been expanded based on provided feedback. Additionally, the data analysis has been expanded, with a new figure showing the regional trends for NW, CW, CE, SW, and SE Greenland, along with 9 additional glacial flowline graphs:

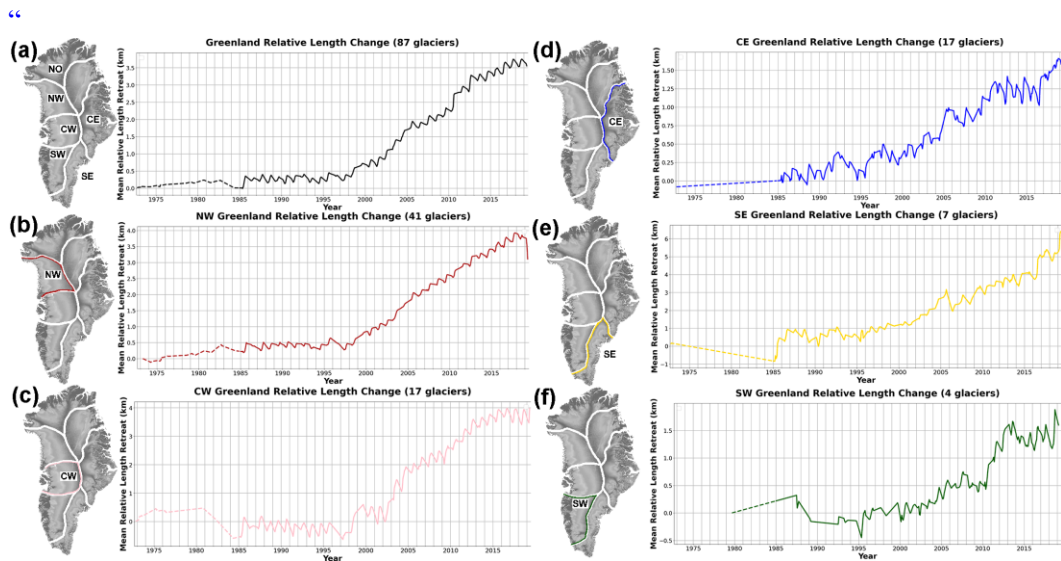

Figure 14. Regional Terminus Advance and Retreat Over Time. (a-f) Regional delineations (left) and terminus position graphs (right) for Greenland (a) and the northwestern (b), central western (c), central eastern (d), southeastern (e), and southwestern (f) regions. Note that the total Greenland mean advance and retreat is unadjusted, and dominated by the trend lines of numerous smaller glaciers in CW and NW Greenland. Note that branches in the 66 studied basins are independently counted, for a total of 87 glaciers.

Additionally, Fig. 14 shows the regional mean advance and retreat change, alongside the mean for the entirety of Greenland covered by the CALFIN dataset. Contributions from NW Greenland influence the overall trend the most, due to the presence of many small glaciers/branches in the regions. Note that the mean for Greenland also includes contributions from Petermann, which is visible in the summers of 2010 and 2012. Shared

regional trends are visible across NW and CW Greenland, which both show relative stability before 2000, followed by steady retreat up until 2017-2018. CE and SE Greenland also share similar but less pronounced retreat, showing accelerating retreat beginning around 1995. These regional trends are less visible in SW Greenland, which is dominated by Narsap Sermia's retreat from 2010-2013. Overall, these regional trends generally agree with studies such as Wood et al. (2021) and King et al. (2020), helping further validate the CALFIN method and data."

Specific Comments:

Pg 1 – Ln 2: The results uses -> the method uses

Done.

Pg 1 – Ln 6: CALFIN provides improvements: briefly describe these improvements

Among existing works, CALFIN improves on the spatial accuracy, is applied towards a large selection of glacial basins, and provides the outputs for scientific usage. "...improvements on the current state of the art." is now described as "...improves on the state of the art in terms of the spatio-temporal coverage and accuracy of its outputs."

Pg 1 – Ln 7: CALFIN's ability to generalize to SAR imagery is also evaluated: briefly describe the outcome.

CALFIN is able to process SAR imagery with similar levels of accuracy when compared to its performance on Landsat image, and is competitive with existing studies. "CALFIN's ability to generalize to SAR imagery" has been moved from the abstract and expanded upon in Sect 2. (see the response to Pg 2 – Ln 12).

Pg 1 – Ln 8: ..deviating by 2.25 px -> deviating by on average 2.25 px

Done.

Pg 2 – Ln 4: Previous techniques -> Previous automated techniques

Done.

Pg 2 – Ln 3: . . .is a a strong. . . -> is a strong

Fixed.

Pg 2 – Ln 7: Something seems to be missing after this sentence, what has been done already on this topic and what are you going to do/improve in this study? See also above issue raised above.

Thank you for raising these points - the section has been expanded upon, and now includes a literature review of existing work and a statement of goals. The added text is as follows:

"Existing work by Mohajerani et al. (2019) pioneers the usage of these techniques by applying the Ronneberger et al. (2015) UNet deep neural network for towards Jakobshavn, Helheim, Sverdrup, and Kangerlussuaq. It achieves a mean distance error of 96.3 m, but is restricted by the preprocessing requirement of aligning the flow direction to be vertical, and inability to handle branching/non-linear calving fronts. Zhang10et al.

(2019) evaluates a modified UNet applied to TerraSAR-X data over Jakobshavn, and achieves a mean distance error of 104 m, but is limited in scope. Baumhoer et al. (2019) expands the application of the UNet to Sentinel 1 imagery of Antarctica, extracting full coastline delineations and achieving a mean distance error of 108 m. Ultimately, these case studies provide the groundwork for the automatic, accurate, large scale, long time-series, high temporal resolution, and potentially multi-sensor extraction of glacial terminus positions. This study seeks to assess the feasibility of achieving robust automatic extraction for a selection of Greenland's glaciers, and to provide the resulting dataset for use by the wider community. Additionally, this study seeks to assess improvements to the neural network design and post-processing methods."

Pg 2 – Ln 9: Sect 4.1 -> Sect 4

Fixed.

Pg 2 – Ln 9/10: Sect. 5 and Sect. 6 shows as well as discusses the results -> Sect. 5 and Sect. 6 show and discuss the results.

Done.

Pg 2 – Ln 12: Sentinel: Sentinel-1 or 2? Not clear from table or text.

We use Sentinel 1 - this is now addressed by a new paragraph at the end of Sect. 2, describing the addition of Sentinel 1A/B Antarctic SAR data for the sole purposes of training and validating the CALFIN methodology. We have added the following new paragraph to this Section:

"For the training and validation of the CALFIN methodology, Sentinel 1A/B SAR images are added to enforce the applicability of the method to other sensor types and domains. The area of interest for the training and validation of the methodology thus includes Antarctic SAR data in addition to the Greenlandic Landsat optical data (see Sect. and Fig. S4). The product used is the Extra Wide Swath, Ground Range Multi-Look Detected, 40 meter resolution HH polarization band. The other data products and polarization bands are not used since the HH backscatter intensity provides sufficient information for the data processing methodology to succeed. A characteristic of Sentinel 1A/B - and SAR data in general - is the presence of speckle noise, which is addressed by the methodology described in the following section."

Pg 2 – Section 2: This section is too brief and there is no need to add the table if only Landsat data is used in the current work as stated. Aside, it is not clear which Sentinel is meant, e.g. the Sentinel-1 SAR satellite has a repeat cycle of 6/12, not 10/12, Sentinel-2 has 10 days but is optical. Why not use higher resolution 15 m panchromatic band Landsat data?

Thank you for raising these points – the first is addressed by the revisions to Sect. 2, which describes the use of Landsat data for dataset production, and both Landsat as well as Sentinel 1A/B data for training and validation.

The 15-meter resolution panchromatic band is not used due to resolution bottlenecks in the data processing methodology. In other words, the increase in resolution did not provide significant increases in accuracy, as it would be downscaled to the same

resolution as the 30 meter inputs to fit the small neural network input size. This clarification has been added to the end of the first paragraph in Sect. 2.

Pg 2 – Ln 15: The basin selection is based on high drainage volume, based on what source? Also, for robust methodological development it is better to base the selection of study sites on different (fjord/glacier) morphology, scale or front type (e.g. with melange, no melange).

The selection metric is based off the basin area/velocities from Nagler et al., 2015. The basins are indeed also selected for robust methodological development, and the 10 areas of interest as well as any nearby basins were selected to contain unique features like ice tongues, branches, and various mélanges types. The line now states this explicitly as “The basins are selected for their high drainage volume, wide spatial distribution, and diverse morphological features.”

Pg 2 – Ln 20: remove space at beginning.

Fixed.

Pg 3 – Ln 1: This produces -> This results in

Done.

Pg 4 – Ln 2: resized: Do you mean crop or actually resize, as the latter would involve changing the resolution?

The subsets are resized, and the resolution is indeed changed. This loss of resolution is addressed by the reprocessing step, where the subset is recropped at the original resolution and resized again, to allow for maximum resolution within the constraints of the neural network input size.

Pg 4 – Ln 1: ..cloud pixel.. -> how are the cloud pixels identified? Did you include a cloud detection?

The cloud pixels are identified using the Landsat QA band, which assigns each pixel a value based on its detected cloud coverage. The line has been clarified as “...cloud pixels detected in the Landsat QA band.”. We rely on the provided cloud masks given by Landsat to do additional filtering per subset, as the scene cloud cover filtering only filters raster based on whole scene cloud coverage.

Pg 4 – Ln 14/16: encoder/decoder: it would be nice to show this in the figure for clarity

Done.

Pg 4 – Ln 22: 224 px: wasn't it 256, can you clarify?

The 256px subsets are split into 9 224 px overlapping windows. The Sect. 3, Methodology flowchart (Fig. 3) and Sect. 3.2p4 now clarifies this apparent discrepancy.

Pg 4 – Ln 22: What is the effect of the reduction in input resolution?

This is a good question, as the reduction of input resolution allows for greater complexity, faster training, and higher practical accuracy of the model, but limits the maximum theoretical spatial accuracy of the network. We use other methods (such as

overlapping subsets) to extract higher accuracy predictions from the lower input resolution model.

These considerations have been clarified, and the line has been rephrased to state how reducing the input size results indirectly in increased accuracy, from “To facilitate faster training and performance, the input size is reduced from 512 px to 224 px” to “The input size is reduced from 512 px to 224 px to facilitate better computational performance, allowing for additional training and thus higher accuracy”.

Pg 6 – Ln 4: This section is too brief and needs more details on the confidence measure and applied filter criteria.

This is a fair point - the section has been expanded, and surrounding sections have been rearranged to better support the new narrative. The added material is as follows:

“Once each front is located, its bounding box is used to extract a higher resolution subset from the original image, and reprocessed. This innovation allows for increased spatial accuracy when processing multiple fronts in large basins. After reprocessing, the nature of CALFIN-NN’s dual outputs as a confidence measure is exploited to filter and discard uncertain detections. Since the neural network assigns each pixel a value between 0 and 1 based on its perceived class, any deviation from these two values can be used as a measure of uncertainty. The filtering method averages the deviation of the ice/ocean classification masking a 5 pixel wide buffer around the calving front, and discards any fronts whose mean deviation exceeds an empirically chosen threshold of 0.125.”

Pg 6 – Ln 12: Fjord boundary masks: how are these created and based on what source data? Can you expand on this? Also, are they static for the whole time series? I can imagine that ice thinning over several decades affects the ice/ocean/fjord boundary.

Thank you for these questions and comments - the masks are static and manually created using the image subsets and BedMachine V3 for reference. They are static and averaged across the whole time series – while there are indeed minor changes in the coastline over this time, they do not affect the accuracy of the calving front delineation within the fjord.

This has been clarified as “Static masks of the average fjord boundaries are first created for each basin using the image subsets and BedMachine V3 for reference”

Pg 6 – Ln 18: . . .verification each. . . -> verification of each

Fixed.

Pg 7 – Ln 2: error -> the error

Fixed.

Pg 7 – Ln 7: data that is -> data that are

Fixed.

Pg 8 – Ln 2: list tables that print -> show tables with

Done.

Pg 8 – Ln 8: CALFIN-VS-L7-only/none: explain what this means

A new sentence has been added to this section, which now defines CALFIN-VS-L7-only/ CALFIN-VS-L7-none: “To evaluate performance on Landsat 7 Scanline Corrector Errors, the validation subset CALFIN-VS-L7-only isolates images with L7SCEs, and the CALFIN-VS-L7-none excludes images with L7SCEs.”

Pg 8 – Ln 11: Antarctic basins: this contradicts Pg 2 - Ln 14 stating that the area of interest is restricted to Greenland

This observation is appreciated - the response to Pg 2 – Ln 12 addresses this by adding a new paragraph at the end of Sect. 2, Data Source and Scope, describing the addition of Antarctic SAR data for the sole purpose of training and validating the CALFIN methodology.

Pg 8 – section 4.3.1: The varying conversion of pixels to distance in this paragraph is confusing, can you clarify this, what is the pixel resolution, how is this calculated, why does it vary?

The pixel conversion varies due to 2 effects: images are reprocessed at lower sizes due to detection failures (see Fig. 5c), and pixel error increases as resolution decreases (see Sect. 4.1). Since the pixel-to-meter rate is depends on the scaling factor of each subset, the distribution of rates changes as Landsat 7 images are added/removed.

The methodology flowchart and the elaboration of the filtering/reprocessing step should make this interaction of effects more understandable.

Additionally, the addition of scales to the subsets should aid in communicating the different pixel to meter conversion ratios per subset.

Furthermore, the pixel error metrics have been removed from the paragraph to reduce confusion and to not detract from the more intuitive meter error metrics.

Pg 9 – Ln 2: generalization capability: please briefly explain what this means.

In this context, generalization capability is the ability of a neural network to accurately make new predictions on data it has not been trained on before.

The line “This demonstrates the generalization capability of CALFIN-NN” has been clarified as “This demonstrates CALFIN-NN’s ability to accurately process new data”.

Pg 9 – section 4.3.3 & 4.3.4: For both intercomparisons the mean pixel distance comparisons is skewed, in the caption of figure 11 it is also mentioned ‘undeservedly’. How then can we use this metric to decide which one is better?

This is a good question - the mean pixel distance metric can be used to decide which network is better only when comparing neural networks of the same input size. Indeed, the metric is not useful when comparing networks of different input sizes, since it favors smaller input sizes.

We still provide the metric for comparison to provide additional context when comparing CALFIN with existing studies, as these studies have done the same.

Pg 11 – Ln 14: make sure to make this an active link.

Fixed and verified.

Pg 12 – Ln 3-5: Too brief, more discussion needed to explain the loss function.

Thanks for this noting this shortcoming in the manuscript - a more detailed explanation and relevant equations have been added as follows:

“To increase accuracy, a custom loss function optimizes the binary cross entropy and Intersection-over-Union (see Eq. 1, Sect.4.1). This penalizes mismatches between calving front pixels in the predicted ( $\mathbf{I}_{cf}$ ) and measured ( $\hat{\mathbf{I}}_{cf}$ ) image masks. Similarly mismatched ice/ocean pixels in the predicted ( $\mathbf{I}_{io}$ ) and measured ( $\hat{\mathbf{I}}_{io}$ ) image masks are less heavily weighted by an empirically chosen factor of  $\alpha = 1/25$ , as seen in the final loss function  $\mathbf{L}$  in Eq. 2.”

$$BCE_{IoU}(\mathbf{I}, \hat{\mathbf{I}}) = -\mathbf{I} \cdot \log(\hat{\mathbf{I}}) - (1 - \mathbf{I}) \cdot \log(1 - \hat{\mathbf{I}}) - \log\left(\frac{\mathbf{I} \cap \hat{\mathbf{I}}}{\mathbf{I} \cup \hat{\mathbf{I}}}\right) \quad (1)$$

$$\mathcal{L}(\mathbf{I}_{cf}, \hat{\mathbf{I}}_{cf}, \mathbf{I}_{io}, \hat{\mathbf{I}}_{io}) = \alpha \cdot BCE_{IoU}(\mathbf{I}_{io}, \hat{\mathbf{I}}_{io}) + (1 - \alpha) \cdot BCE_{IoU}(\mathbf{I}_{cf}, \hat{\mathbf{I}}_{cf}) \quad (2)$$

Pg 12 – Ln 5: Explain what is meant by “over-fitting”

In this context, “over-fitting” means that the model has been trained too heavily on a small dataset, and has only effectively memorized it instead of learning more general features of the observed data. This prevents it from accurately making predictions on new data, as it has “over-fit” the training data.

These lines have been rephrased to be clearer, from “To prevent over-fitting the neural network” to “In order to train the neural network”, and from “Another measure to prevent over-fitting involves data augmentation” to “Data augmentation is used during training to increase the accuracy of the network when processing new data”.

The only other instance of “over-fitting” on Pg 15, Sect 6.4. is elaborated as “over-fitting, or memorizing”.

Pg 12 – Ln 12-13: Once. . .processing: sentence incomplete.

Thanks for catching this error. The line has been fixed and rephrased from “Once trained, an NVIDIAGTX 1080 with 6GB VRAM for off-line data processing” to “Once trained, an NVIDIA GTX1060 with 6GB VRAM is used for the off-line data processing of the 20188 GeoTIFF subsets”. The phrase “of the 20188 GeoTIFF subsets” has been moved from a subsequent line to clarify what data is being processed off-line.

Pg 12 – Ln 25: While the methodology is restricted by its preprocessing requirements and inability to handle branching/nonlinear calving fronts: How are the preprocessing requirements different?

The primary difference in preprocessing requirements is the necessary alignment of the flow direction to be vertical. This line has been elaborated as “the preprocessing requirement of aligning the flow direction to be vertical”.

Pg 12 – Section 6.2: Some of this existing work description should go to the introduction to show where gaps/shortcomings are and as motivation for the improvements introduced in the current implementation.



Thank you for this suggestion - Sect. 6.2 has been integrated into the introduction, along with descriptions of the gaps/shortcomings of each approach that form the motivation for the study. The end of the first paragraph of the introduction now reads, “Existing work by Mohajerani et al. (2019) pioneers the usage of these techniques by applying the Ronneberger et al. (2015) UNet deep neural network for towards Jakobshavn, Helheim, Sverdrup, and Kangerlussuaq. It achieves a mean distance error of 96.3 m, but is restricted by the preprocessing requirement of aligning the flow direction to be vertical, and inability to handle branching/non-linear calving fronts. Zhang et al. (2019) evaluates a modified UNet applied to TerraSAR-10X data over Jakobshavn, and achieves a mean distance error of 104 m, but is limited in scope. Baumhoer et al. (2019) expands the application of the UNet to Sentinel 1 imagery of Antarctica, extracting full coastline delineations and achieving a mean distance error of 108 m. Ultimately, these case studies provide the groundwork for the automatic, accurate, large scale, longtime-series, high temporal resolution, and potentially multi-sensor extraction of glacial terminus positions. This study seeks to assess the feasibility of achieving robust automatic extraction for a selection of Greenland’s glaciers, and to provide the resulting dataset for use by the wider community. Additionally, this study seeks to assess improvements to the neural network design and post-processing methods.”

Pg 13 – Section 6.3: As mentioned in the general comment, this section is hardly a data analysis and very brief, even the description of the figure. A clear improvement, obvious from the figure, is the much denser and longer temporal coverage, this should be mentioned somewhere.

Thank you for pointing out this weakness in the original manuscript. The figure description has been expanded with the following details: “Note the seasonal variations shown by the solid lines, and the dotted lines from 1972-1985 that indicate a lack of such seasonal observations. Also note that the vertical axis scaling is applied differently for each graph to highlight seasonal trends.” Text that highlights the denser and longer temporal coverage has been added throughout the section. Furthermore, the original Fig. 12 (now Fig. 13) has been expanded to include additional flowlines:

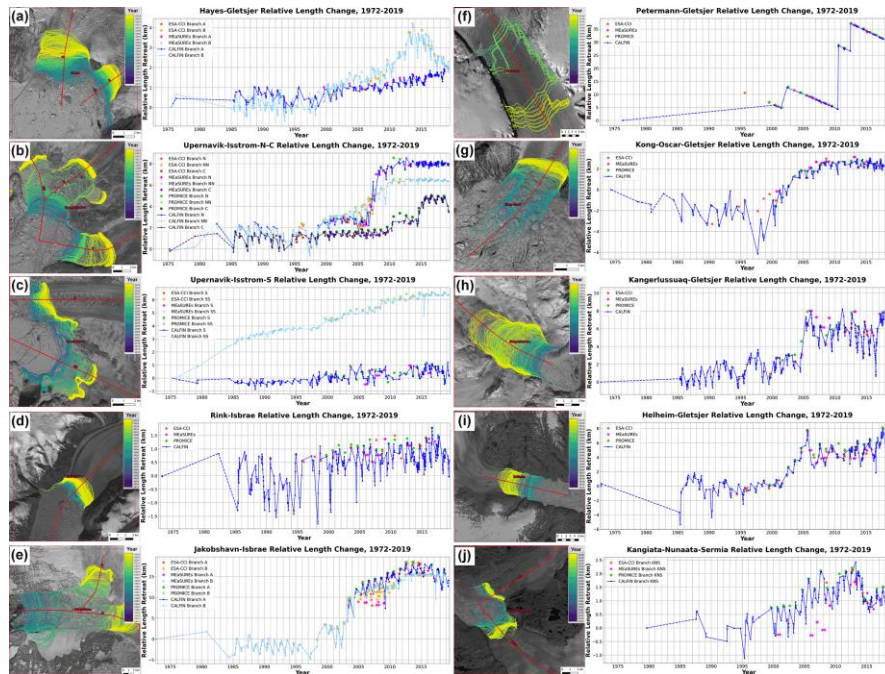

Figure R1. Updated Terminus Advance and Retreat Over Time

See also the response to the general comment for additional added content that adds to the data analysis.

Pg 13 – Ln 2: validate -> compare

Done.

Pg 13 – Ln 7: length change -> I would rather call it “advance and retreat”

Done.

Pg 13 – Ln 18/19: To perform . . . the results: this sentence seems incomplete.

Thank you for noticing this – the sentence has been rephrased for clarity, from “To perform this task, the M-NN is retrained using CALFIN training data, process validation data, and compare the results” to “This task involves retraining the M-NN on CALFIN training data, and comparing its performance against CALFIN-NN using a shared validation set”.

Pg 14 – Ln 18: ground truth fronts: None of these fronts are actual ground truth fronts, even when manually delineated (also elsewhere in manuscript).

This is a good point, and has been corrected from “ground truth” to “manually delineated” throughout the manuscript.

Pg 15 – Ln 2: Overall, the goal of . . . : this goal was nowhere clearly stated

This observation is appreciated, and the introduction has been edited to include this goal, which is stated as, “This study seeks to assess the feasibility of achieving robust automatic extraction for a selection of Greenland’s glaciers, and to provide the resulting

dataset for use by the wider community. Additionally, this study seeks to assess improvements to the neural network design and post-processing methods.”

### **Figures/Tables:**

Most figures lack a proper scale bar, this would be very helpful to evaluate the different results. Also, individual lines are sometimes very difficult to distinguish (for example in fig 10). Not sure if this can be improved.

Thank you for this suggestion - scale bars have been added in Figs. 9-13, and high contrast colorblind-friendly line colors have been added for Figs. 6-12.

Table 1: As no data other than Landsat is used in the study, I don't see much need for this table. See issue raised previously.

Table 1 has been removed.

Figure 1: For a nicer figure, updated maps, without gaps, are available at the Greenland Ice Sheet CCI website (see: <http://esa-icesheets-greenland-cci.org/>)

Thanks for this suggestion, Fig. 1 has been updated to utilize an updated gapless velocity map.

Figure 2: The legend should provide a range

Fig. 2 key has been updated to show the full range of the data.

Figure 3 & 5: No need to add c) in my opinion

This is a fair suggestion that highlights the lack of importance placed on the filtering step in the manuscript. To address this concern, Fig. 3 & 5 (now 4 & 6) have added a visualization of the filtering under (c), as shown in the new flowchart (now Fig. 3).

Figure 6: It appears that several 'difficult' sections/gaps are connected with a straight line, how does this work (e.g. what gap thresholds are used)?

This is a valuable question that highlights the manuscript's insufficient explanation of this algorithm. Gaps are given negative exponential distance-based weights, so that they add a penalty to the maximum path, but can be used if they connect two long paths in the final Minimum Spanning Tree. An explanation of this behavior has been added to the end of Sect. 3.3.1: "Such gaps are given weights based on the negative exponential distances between nodes, which allows for connections if the paths connected are significantly longer than the gap itself."

Figure 6a: I don't see a red coastline mask

Fig. 6 (now Fig. 7) has been updated to use a high contrast colorblind-friendly color scheme, and the red coastline mask has been enhanced to make it more visible.

Figure 8-12: There seem to be no references in the text to these figures, please add.

Thank you for noting this, references to these figures (now Fig. 9-13) have been added in the text.

Figure 12: caption “Sample” -> Examples

Done.

Figure 13: caption “1995-2016 (ESA-CCI), 2005-2017 (MEaSURES)”: check years vs line in image, ESA CCI starts in 1990, MEaSURES in 2000

Fixed.
